# Supplementary material
Source: Springer Nature journal article supplement (https://www.springermedizin.de/resource/supplementary/12948_2011_98_MOESM1_ESM.pdf/9557190)

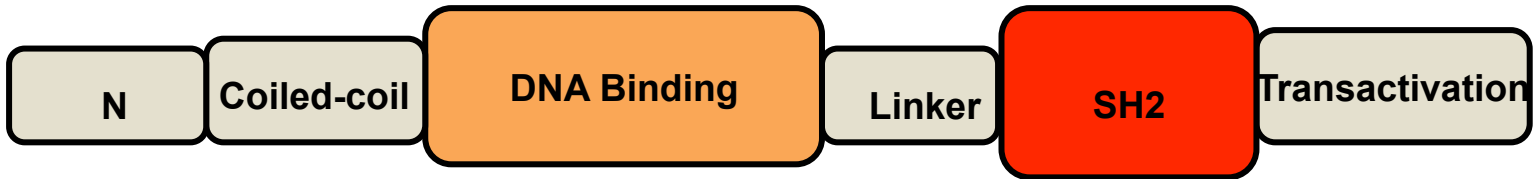

**K591M**

Supplement: MOESM1 [file 9557190]
